# Supplementary material for: Targeted use of heparin, heparinoids, or low-molecular-weight heparin to improve outcome after acute ischaemic stroke: an individual patient data meta-analysis of randomised controlled trials
Source: PubMed Central journal article supplement (PMC3671273; doi:10.1016/s1474-4422(13)70079-6), 2013-06
Supplement: mmc1.pdf [file mmc1.pdf]

# THE LANCET **Neurology**

## **Supplementary webappendix**

This webappendix formed part of the original submission and has been peer reviewed. We post it as supplied by the authors.

Supplement to: Whiteley WN, Adams HP Jr, Bath PMW, et al. Targeted use of heparin, heparinoids, or low-molecular-weight heparin to improve outcome after acute ischaemic stroke: an individual patient data meta-analysis of randomised controlled trials. *Lancet Neurol* 2013; published online May 2. [http://dx.doi.org/10.1016/S1474-4422\(13\)70079-6](http://dx.doi.org/10.1016/S1474-4422(13)70079-6).

## Targeted use of heparin, heparinoids, or low-molecularweight heparin to improve outcome after acute ischaemic stroke: an individual patient data meta-analysis of randomised controlled trials

### SUPPLEMENTAL MATERIAL

| Guideline organisation and date                                                                                            | Title                                                                           | For the prevention of recurrent stroke |           | For the prevention of venous thromboembolism |           |                             |                                     |
|----------------------------------------------------------------------------------------------------------------------------|---------------------------------------------------------------------------------|----------------------------------------|-----------|----------------------------------------------|-----------|-----------------------------|-------------------------------------|
|                                                                                                                            |                                                                                 | Uncertain benefit of targeting         | Avoid all | Treat all                                    | Avoid all | Treat at 'high risk' of VTE | Avoid if 'high risk' of haemorrhage |
| <b>Acute stroke guidelines</b>                                                                                             |                                                                                 |                                        |           |                                              |           |                             |                                     |
| Institute for Clinical Systems Improvement 2010                                                                            | Diagnosis and treatment of ischemic stroke                                      | ✓                                      | ✓         | ✓                                            |           |                             |                                     |
| Joint Stroke Guideline Development Committee of the American Academy of Neurology and the American Stroke Association 2002 | Anticoagulants and antiplatelet agents in acute ischemic stroke                 |                                        | ✓         |                                              |           | ✓                           | ✓                                   |
| American College of Chest Physicians 2012                                                                                  | Antithrombotic and thrombolytic therapy for ischemic stroke                     |                                        | ✓         | ✓                                            |           |                             |                                     |
| National Institute for Health and Clinical Excellence 2008                                                                 | Diagnosis and Initial management of acute stroke and transient ischaemic attack |                                        | ✓         |                                              |           | ✓                           |                                     |
| American Association of Neuroscience Nurses 2008                                                                           | Guide to the care of the hospitalized patient with ischemic stroke              |                                        |           |                                              |           | ✓                           | ✓                                   |
| Canadian best practice recommendations for stroke care 2010                                                                | Acute stroke management                                                         |                                        | ✓         |                                              |           | ✓                           | ✓                                   |
| Scottish Intercollegiate Guidelines Network 2008                                                                           | Management of patients with stroke or TIA: assessment, investigation, immediate |                                        | ✓         |                                              |           | ✓                           |                                     |

| Guideline organisation and date                                                 | Title                                                                                                            | For the prevention of recurrent stroke |           | For the prevention of venous thromboembolism |           |                             |                                     |
|---------------------------------------------------------------------------------|------------------------------------------------------------------------------------------------------------------|----------------------------------------|-----------|----------------------------------------------|-----------|-----------------------------|-------------------------------------|
|                                                                                 |                                                                                                                  | Uncertain benefit of targeting         | Avoid all | Treat all                                    | Avoid all | Treat at 'high risk' of VTE | Avoid if 'high risk' of haemorrhage |
|                                                                                 | management and secondary prevention                                                                              |                                        |           |                                              |           |                             |                                     |
| Singapore Ministry of Health 2009                                               | Stroke and transient ischaemic attacks. Assessment, investigation, immediate management and secondary prevention |                                        | ✓         |                                              | ✓         |                             |                                     |
| European Stroke Organisation 2008                                               | Guidelines for the management of Ischaemic Stroke                                                                |                                        | ✓         |                                              |           | ✓                           |                                     |
| American Heart Association/<br>American Stroke Association Stroke Council, 2007 | Guidelines for the Early Management of Adults With Ischemic Stroke                                               |                                        | ✓         |                                              |           |                             |                                     |
| National Stroke Foundation, Australia 2010                                      | Clinical Guideline for Stroke Management                                                                         |                                        |           |                                              |           | ✓                           |                                     |
| <b>Prevention of VTE guidelines</b>                                             |                                                                                                                  |                                        |           |                                              |           |                             |                                     |
| Institute for Clinical Systems Improvement 2011                                 | Venous thromboembolism prophylaxis                                                                               |                                        |           | ✓                                            |           |                             |                                     |
| American College of Physicians 2011                                             | Venous thromboembolism prophylaxis in hospitalized patients                                                      |                                        |           |                                              |           | ✓                           | ✓                                   |
| National Institute for Health and Clinical Excellence 2010                      | Venous thromboembolism: reducing the risk                                                                        |                                        |           |                                              |           | ✓                           | ✓                                   |
| Scottish Intercollegiate Guidelines Network 2010                                | Prevention and management of venous thromboembolism                                                              |                                        |           |                                              |           | ✓                           |                                     |
| Finnish Medical Society Duodecim 2008                                           | Prevention of venous thromboembolism.                                                                            |                                        |           | ✓                                            |           |                             |                                     |

**Supplementary table 1 Baseline characteristics of patients**

|                                                      | IST     |       | TOAST  |       | FISS-tris |       | HAEST |       | TAIST  |       | Total   |       |
|------------------------------------------------------|---------|-------|--------|-------|-----------|-------|-------|-------|--------|-------|---------|-------|
|                                                      | No.     | %     | No.    | %     | No.       | %     | No.   | %     | No.    | %     | No.     | %     |
|                                                      | N=18836 |       | N=1281 |       | N=603     |       | N=449 |       | N=1486 |       | N=22655 |       |
| <b>Age (years)</b>                                   |         |       |        |       |           |       |       |       |        |       |         |       |
| <50                                                  | 1042    | 5.5%  | 137    | 10.7% | 53        | 8.8%  | 1     | 0.2%  | 73     | 4.9%  | 1306    | 5.8%  |
| 50-59                                                | 1759    | 9.3%  | 231    | 18.0% | 95        | 15.8% | 8     | 1.8%  | 136    | 9.2%  | 2229    | 9.8%  |
| 60-69                                                | 4254    | 22.6% | 384    | 30.0% | 182       | 30.2% | 45    | 10.0% | 330    | 22.2% | 5195    | 22.9% |
| 70-79                                                | 6472    | 34.4% | 420    | 32.8% | 217       | 36.0% | 167   | 37.2% | 561    | 37.8% | 7837    | 34.6% |
| >=80                                                 | 5309    | 28.2% | 109    | 8.5%  | 56        | 9.3%  | 228   | 50.8% | 386    | 26.0% | 6088    | 26.9% |
| <b>Sex</b>                                           |         |       |        |       |           |       |       |       |        |       |         |       |
| Women                                                | 8741    | 46.4% | 504    | 39.3% | 245       | 40.6% | 248   | 55.2% | 678    | 45.6% | 10416   | 46.0% |
| Men                                                  | 10095   | 53.6% | 777    | 60.7% | 358       | 59.4% | 201   | 44.8% | 808    | 54.4% | 12239   | 54.0% |
| <b>Time from stroke onset to randomisation (hrs)</b> |         |       |        |       |           |       |       |       |        |       |         |       |
| 0-6                                                  | 2996    | 15.9% | 48     | 3.7%  | 9         | 1.5%  | 24    | 5.3%  | 53     | 3.6%  | 3130    | 13.8% |
| 6-12                                                 | 3986    | 21.2% | 350    | 27.3% | 38        | 6.3%  | 101   | 22.5% | 219    | 14.7% | 4694    | 20.7% |
| 12-24                                                | 5408    | 28.7% | 862    | 67.3% | 205       | 34.0% | 180   | 40.1% | 428    | 28.8% | 7083    | 31.3% |
| >24h                                                 | 6446    | 34.2% | 6      | 0.5%  | 350       | 58.0% | 143   | 31.8% | 761    | 51.2% | 7706    | 34.0% |
| missing                                              | 0       | 0.0%  | 15     | 1.2%  | 1         | 0.2%  | 1     | 0.2%  | 25     | 1.7%  | 42      | 0.2%  |
| <b>History of MI</b>                                 |         |       |        |       |           |       |       |       |        |       |         |       |
| no                                                   | -       | -     | 928    | 72.4% | 549       | 91.0% | 292   | 65.0% | 1229   | 82.7% | 2998    | 13.2% |
| yes                                                  | -       | -     | 343    | 26.8% | 50        | 8.3%  | 157   | 35.0% | 232    | 15.6% | 782     | 3.5%  |
| missing                                              | -       | -     | 10     | 0.8%  | 4         | 0.7%  | 0     | 0.0%  | 25     | 1.7%  | 18875   | 83.3% |
| <b>History of stroke</b>                             |         |       |        |       |           |       |       |       |        |       |         |       |
| no                                                   | -       | -     | 1038   | 81.0% | 500       | 82.9% | 341   | 75.9% | 1271   | 85.5% | 3150    | 13.9% |
| yes                                                  | -       | -     | 232    | 18.1% | 103       | 17.1% | 108   | 24.1% | 194    | 13.1% | 637     | 2.8%  |
| missing                                              | -       | -     | 11     | 0.9%  | 0         | 0.0%  | 0     | 0.0%  | 21     | 1.4%  | 18868   | 83.3% |

|                                                 | IST   |       | TOAST |       | FISS-tris |       | HAEST |       | TAIST |        | Total |       |
|-------------------------------------------------|-------|-------|-------|-------|-----------|-------|-------|-------|-------|--------|-------|-------|
|                                                 | No.   | %     | No.   | %     | No.       | %     | No.   | %     | No.   | %      | No.   | %     |
| <b>History of hypertension</b>                  |       |       |       |       |           |       |       |       |       |        |       |       |
| no                                              | -     | -     | 413   | 32.2% | 169       | 28.0% | 270   | 60.1% | 726   | 48.9%  | 1578  | 7.0%  |
| yes                                             | -     | -     | 850   | 66.4% | 434       | 72.0% | 179   | 39.9% | 728   | 49.0%  | 2191  | 9.7%  |
| missing                                         | -     | -     | 18    | 1.4%  | 0         | 0.0%  | 0     | 0.0%  | 32    | 2.2%   | 18886 | 83.4% |
| <b>History of diabetes</b>                      |       |       |       |       |           |       |       |       |       |        |       |       |
| no                                              | -     | -     | 893   | 69.7% | 356       | 59.0% | 383   | 85.3% | 0     | 0.0%   | 1632  | 7.2%  |
| yes                                             | -     | -     | 374   | 29.2% | 247       | 41.0% | 66    | 14.7% | 0     | 0.0%   | 687   | 3.0%  |
| missing                                         | -     | -     | 14    | 1.1%  | 0         | 0.0%  | 0     | 0.0%  | 1486  | 100.0% | 20336 | 89.8% |
| <b>Antiplatelet drug prior to randomisation</b> |       |       |       |       |           |       |       |       |       |        |       |       |
| no                                              | 15007 | 79.7% | 732   | 57.1% | 402       | 66.7% | 248   | 55.2% | 922   | 62.0%  | 17311 | 76.4% |
| yes                                             | 3829  | 20.3% | 528   | 41.2% | 193       | 32.0% | 201   | 44.8% | 563   | 37.9%  | 5314  | 23.5% |
| missing                                         | 0     | 0.0%  | 21    | 1.6%  | 8         | 1.3%  | 0     | 0.0%  | 1     | 0.1%   | 30    | 0.1%  |
| <b>OCSP stroke classification</b>               |       |       |       |       |           |       |       |       |       |        |       |       |
| TACS                                            | 4452  | 23.6% | 439   | 34.3% | 34        | 5.6%  | 102   | 22.7% | 523   | 35.2%  | 5550  | 24.5% |
| PACS                                            | 7627  | 40.5% | 148   | 11.6% | 169       | 28.0% | 238   | 53.0% | 473   | 31.8%  | 8655  | 38.2% |
| LACS                                            | 4524  | 24.0% | 540   | 42.2% | 279       | 46.3% | 71    | 15.8% | 422   | 28.4%  | 5836  | 25.8% |
| POCS                                            | 2177  | 11.6% | 153   | 11.9% | 121       | 20.1% | 36    | 8.0%  | 66    | 4.4%   | 2553  | 11.3% |
| missing                                         | 56    | 0.3%  | 1     | 0.1%  | 0         | 0.0%  | 2     | 0.4%  | 2     | 0.1%   | 61    | 0.3%  |
| <b>NIH Stroke Scale<sup>1</sup></b>             |       |       |       |       |           |       |       |       |       |        |       |       |
| 0-5                                             | 1309  | 6.9%  | 449   | 35.1% | 294       | 48.8% | 109   | 24.3% | 153   | 10.3%  | 2314  | 10.2% |
| 6-10                                            | 3893  | 20.7% | 463   | 36.1% | 214       | 35.5% | 135   | 30.1% | 481   | 32.4%  | 5186  | 22.9% |
| 11-15                                           | 8680  | 46.1% | 207   | 16.2% | 68        | 11.3% | 78    | 17.4% | 455   | 30.6%  | 9488  | 41.9% |
| 16-20                                           | 2389  | 12.7% | 75    | 5.9%  | 18        | 3.0%  | 73    | 16.3% | 226   | 15.2%  | 2781  | 12.3% |
| >20                                             | 1654  | 8.8%  | 87    | 6.8%  | 5         | 0.8%  | 54    | 12.0% | 171   | 11.5%  | 1971  | 8.7%  |

<sup>1</sup> Converted from Scandinavian stroke (TAIST, HAEST) or markers of stroke severity (IST)

|                                           | <b>IST</b>       |       | <b>TOAST</b> |       | <b>FISS-tris</b> |        | <b>HAEST</b> |       | <b>TAIST</b> |       | <b>Total</b> |       |
|-------------------------------------------|------------------|-------|--------------|-------|------------------|--------|--------------|-------|--------------|-------|--------------|-------|
|                                           | No.              | %     | No.          | %     | No.              | %      | No.          | %     | No.          | %     | No.          | %     |
| <b>Systolic blood pressure (mmHg)</b>     |                  |       |              |       |                  |        |              |       |              |       |              |       |
| <145                                      | 6031             | 32.0% | 434          | 33.9% | 227              | 37.6%  | 106          | 23.6% | 477          | 32.1% | 7275         | 32.1% |
| 146-170                                   | 7341             | 39.0% | 594          | 46.4% | 239              | 39.6%  | 172          | 38.3% | 608          | 40.9% | 8954         | 39.5% |
| >170                                      | 5464             | 29.0% | 253          | 19.8% | 133              | 22.1%  | 171          | 38.1% | 395          | 26.6% | 6416         | 28.3% |
| <b>Atrial fibrillation</b>                |                  |       |              |       |                  |        |              |       |              |       |              |       |
| no                                        | 14792            | 78.5% | 1166         | 91.0% | 603              | 100.0% | 31           | 6.9%  | 1305         | 87.8% | 17897        | 79.0% |
| yes                                       | 3090             | 16.4% | 115          | 9.0%  | 0                | 0.0%   | 418          | 93.1% | 181          | 12.2% | 3804         | 16.8% |
| missing                                   | 954 <sup>2</sup> | 5.1%  | 0            | 0.0%  | 0                | 0.0%   | 0            | 0.0%  | 0            | 0.0%  | 954          | 4.2%  |
| <b>Evidence of infarction baseline CT</b> |                  |       |              |       |                  |        |              |       |              |       |              |       |
| no                                        | 12449            | 66.1% | 952          | 74.3% | 160              | 26.5%  | 103          | 22.9% | 587          | 39.5% | 14251        | 62.9% |
| yes                                       | 6387             | 33.9% | 329          | 25.7% | 354              | 58.7%  | 346          | 77.1% | 898          | 60.4% | 8314         | 36.7% |
| missing                                   | 0                | 0.0%  | 0            | 0.0%  | 89               | 14.8%  | 0            | 0.0%  | 1            | 0.1%  | 90           | 0.4%  |

**Abbreviations.** OCSP=Oxfordshire community stroke project; TACS=total anterior circulation syndrome; PACS=partial anterior circulation stroke syndrome; LACS=lacunar stroke syndrome; POCS=posterior circulation stroke syndrome.

<sup>2</sup> Atrial fibrillation not recorded in the pilot phase of the trial (n=954).

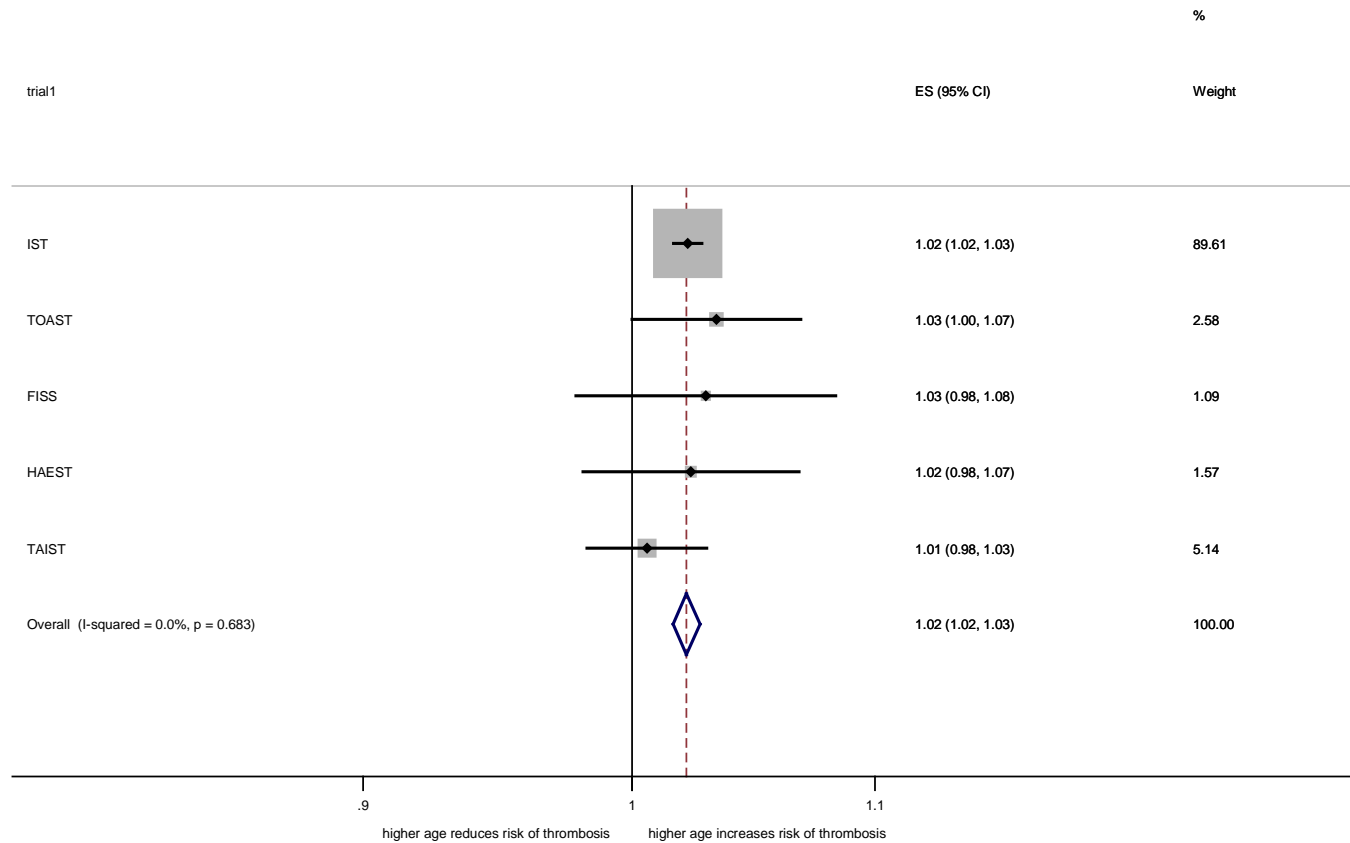

**Supplementary Figure 1.** The odds ratio (ES) for the association between a one year increase in age with thrombotic events 2 weeks post ischaemic stroke. IST: International Stroke Trial; TOAST: Trial of ORG 10172 in Acute Stroke Treatment; TAIST: Tinzaparin in Acute Ischaemic Stroke Trial; HAEST: Heparin in Acute Embolic Stroke Trial; FISS-tris: Fraxiparin in Stroke Study for the treatment of ischemic stroke. I squared: a measure of statistical heterogeneity.

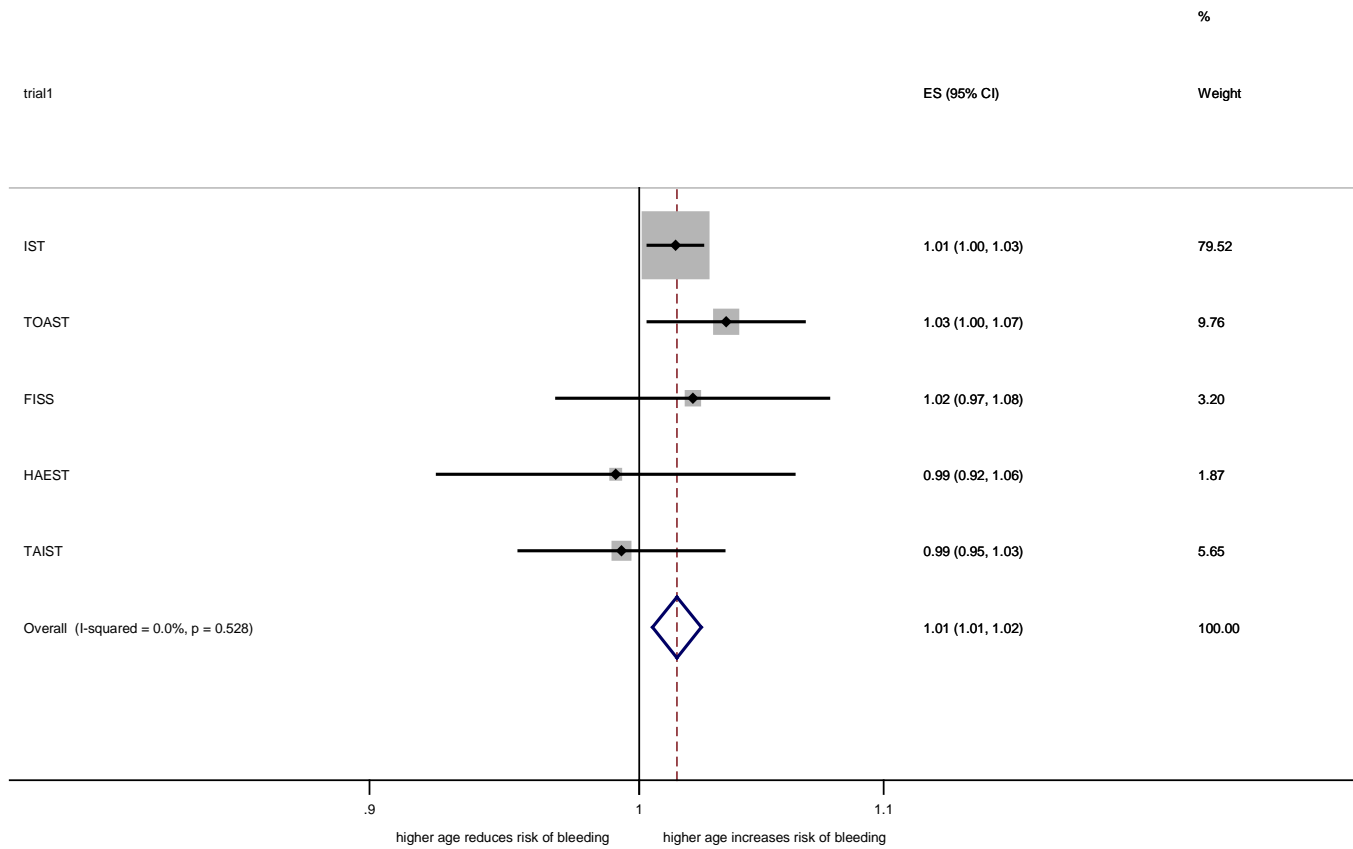

**Supplementary Figure 2.** The odds ratio (ES) between a one year increase in age with haemorrhagic events 2 weeks post ischaemic stroke IST: International Stroke Trial; TOAST: Trial of ORG 10172 in Acute Stroke Treatment; TAIST: Tinzaparin in Acute Ischaemic Stroke Trial; HAEST: Heparin in Acute Embolic Stroke Trial; FISS-tris: Fraxiparin in Stroke Study for the treatment of ischemic stroke. I squared: a measure of statistical heterogeneity.



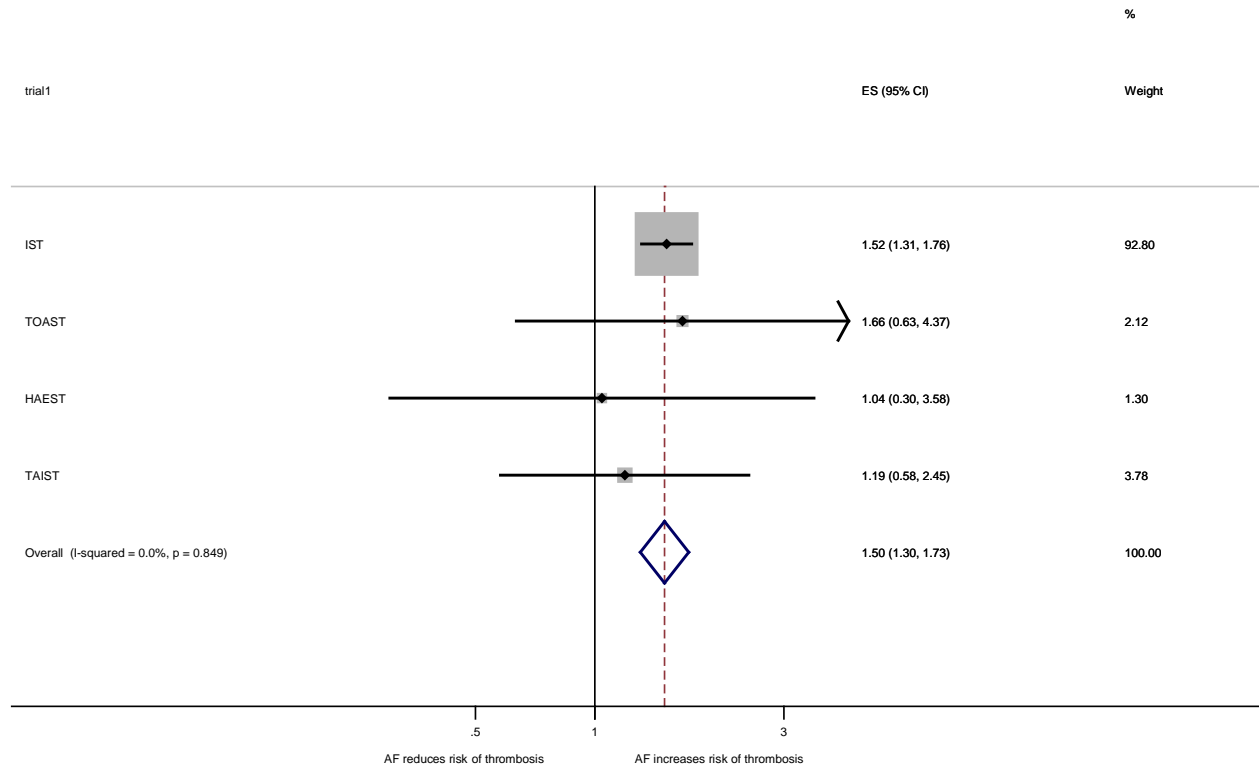

**Supplementary Figure 3.** The odds ratio (ES) between the presence of AF with thrombotic events 2 weeks post ischaemic stroke. IST: International Stroke Trial; TOAST: Trial of ORG 10172 in Acute Stroke Treatment; TAIST: Tinzaparin in Acute Ischaemic Stroke Trial; HAEST: Heparin in Acute Embolic Stroke Trial; FISS-tris: Fraxiparin in Stroke Study for the treatment of ischemic stroke. I squared: a measure of statistical heterogeneity. AF defined uniformly across trials.

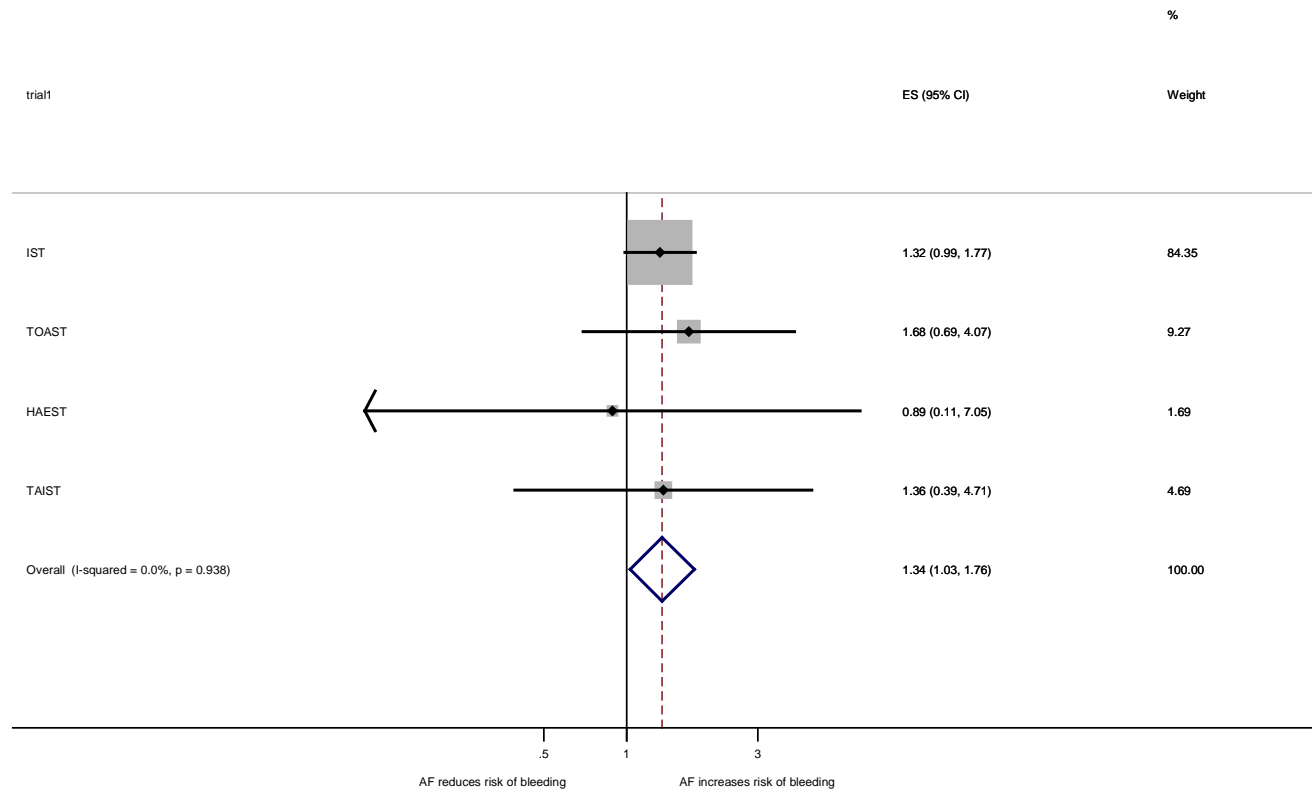

**Supplementary Figure 4.** The odds ratio (ES) between the presence of AF with haemorrhagic events 2 weeks post ischaemic stroke. IST: International Stroke Trial; TOAST: Trial of ORG 10172 in Acute Stroke Treatment; TAIST: Tinzaparin in Acute Ischaemic Stroke Trial; HAEST: Heparin in Acute Embolic Stroke Trial; FISS-tris: Fraxiparin in Stroke Study for the treatment of ischemic stroke. I squared: a measure of statistical heterogeneity. AF defined uniformly across trials.

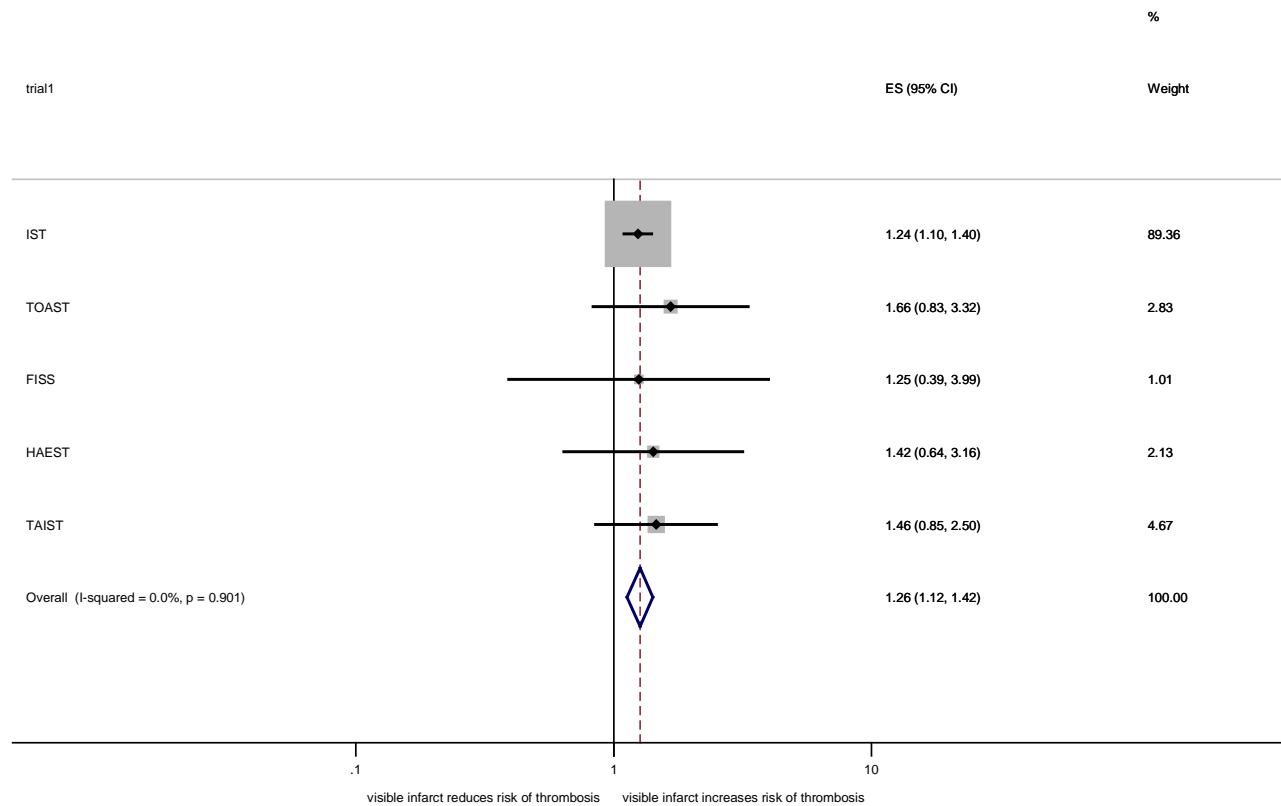

**Supplementary Figure 5.** The odds ratio (ES) between the presence of CT visible infarct with thrombotic events 2 weeks post ischaemic stroke. IST: International Stroke Trial; TOAST: Trial of ORG 10172 in Acute Stroke Treatment; TAIST: Tinzaparin in Acute Ischaemic Stroke Trial; HAEST: Heparin in Acute Embolic Stroke Trial; FISS-tris: Fraxiparin in Stroke Study for the treatment of ischemic stroke. I squared: a measure of statistical heterogeneity.

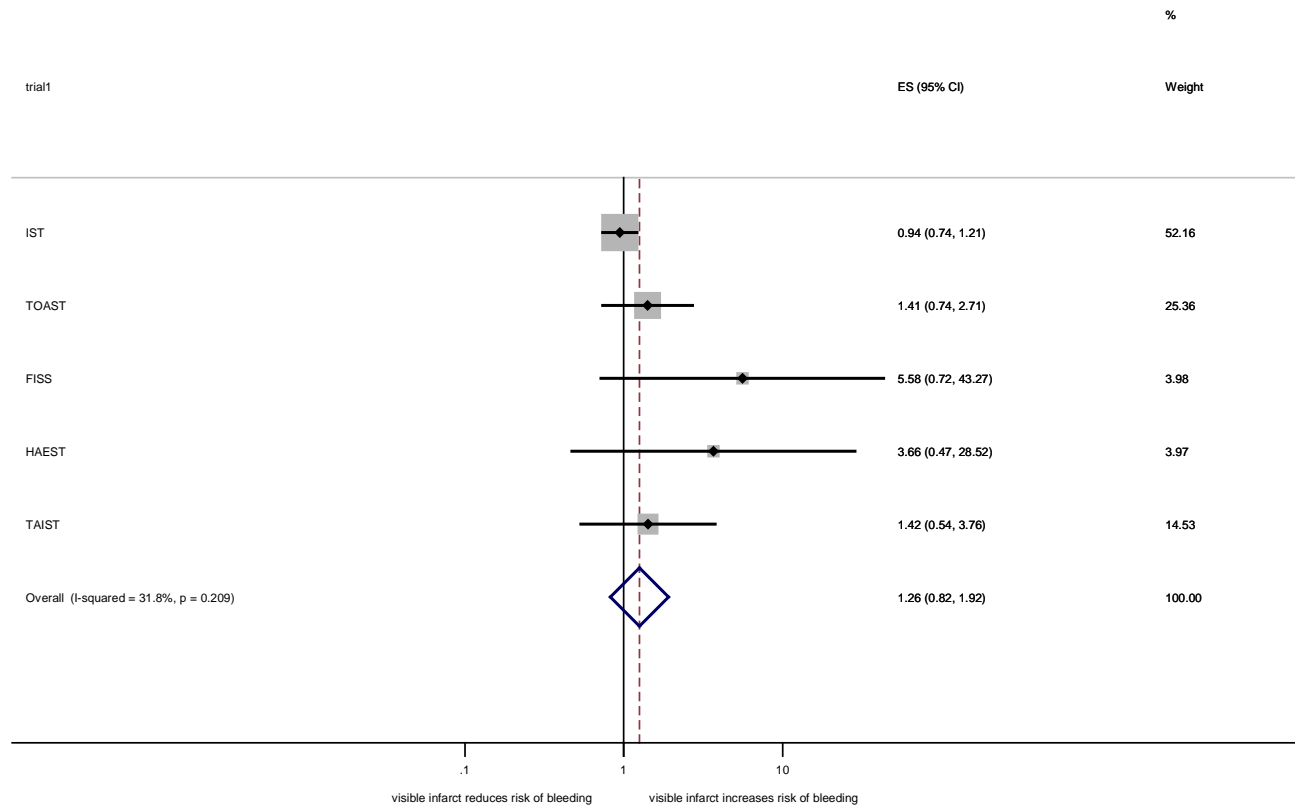

**Supplementary Figure 6.** The odds ratio (ES) between the presence of CT visible infarct with haemorrhagic events 2 weeks post ischaemic stroke. IST: International Stroke Trial; TOAST: Trial of ORG 10172 in Acute Stroke Treatment; TAIST: Tinzaparin in Acute Ischaemic Stroke Trial; HAEST: Heparin in Acute Embolic Stroke Trial; FISS-tris: Fraxiparin in Stroke Study for the treatment of ischemic stroke. I squared: a measure of statistical heterogeneity.

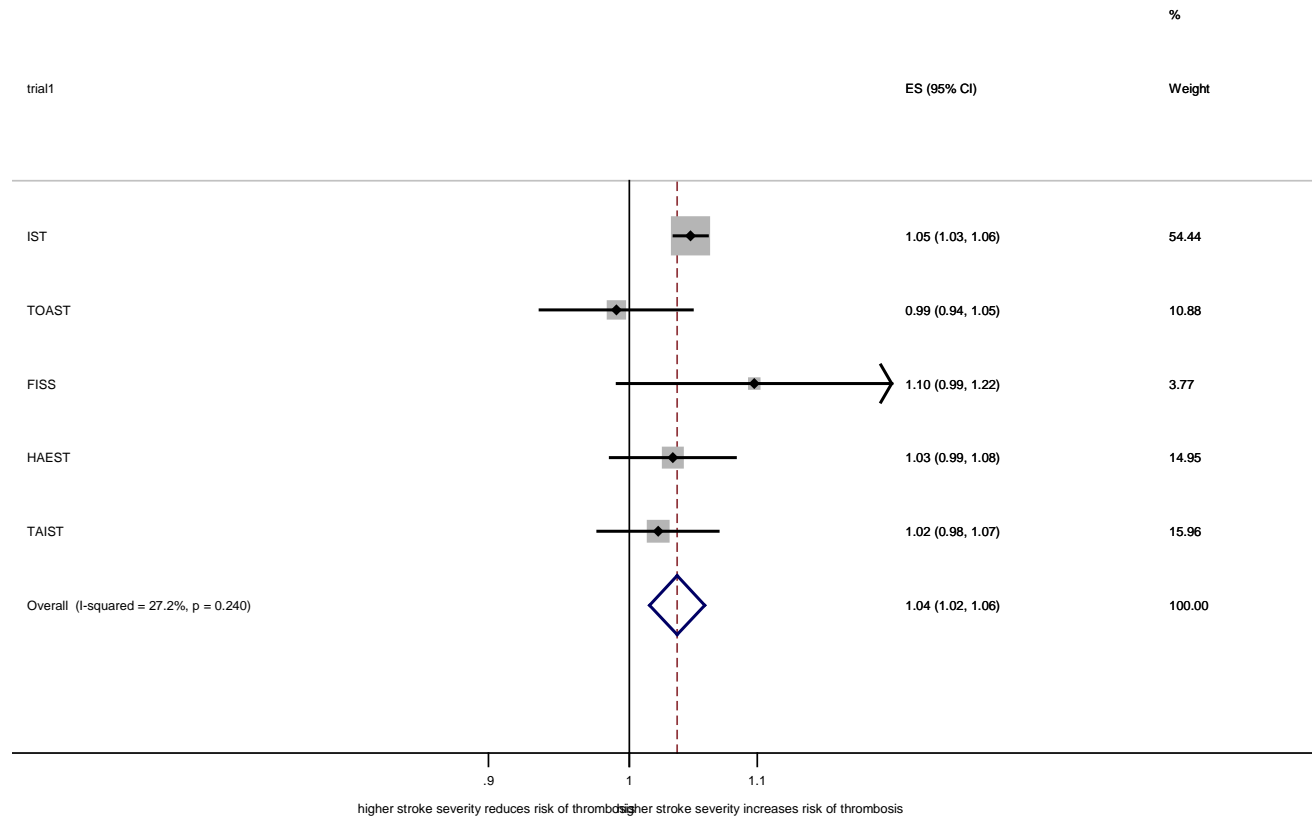

**Supplementary figure 7.** The odds ratio (ES) between a one year increase in NIHSS with thrombotic events 2 weeks post ischaemic stroke. IST: International Stroke Trial; TOAST: Trial of ORG 10172 in Acute Stroke Treatment; TAIST: Tinzaparin in Acute Ischaemic Stroke Trial; HAEST: Heparin in Acute Embolic Stroke Trial; FISS-tris: Fraxiparin in Stroke Study for the treatment of ischemic stroke. I squared: a measure of statistical heterogeneity.

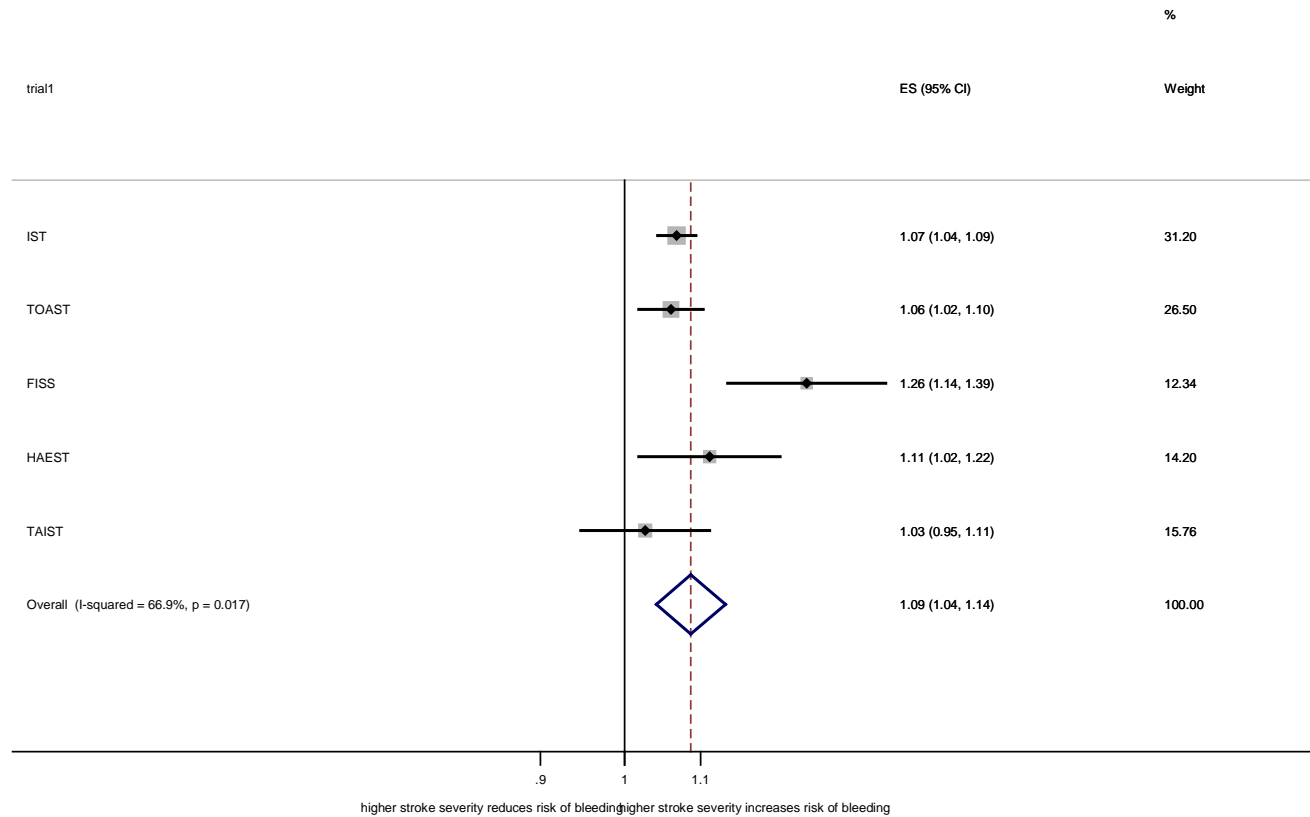

**Supplementary figure 8.** The odds ratio (ES) between a one year increase in NIHSS with haemorrhagic events 2 weeks post ischaemic stroke. IST: International Stroke Trial; TOAST: Trial of ORG 10172 in Acute Stroke Treatment; TAIST: Tinzaparin in Acute Ischaemic Stroke Trial; HAEST: Heparin in Acute Embolic Stroke Trial; FISS-tris: Fraxiparin in Stroke Study for the treatment of ischemic stroke. I squared: a measure of statistical heterogeneity.
